# Supplementary material
Source: ML conference proceedings conference paper supplement (https://proceedings.mlr.press/v97/chiquet19a.html)
Supplement: Supplementary file [file chiquet19a-supp.pdf]

Supplement material for  
Variational Inference of Sparse Network from Count Data  
(ICML 2019)

## S1 Proof of Proposition 1

We first prove the concavity of  $J(\mathbf{B}, \mathbf{M}, \mathbf{S})$ . For fixed  $\boldsymbol{\Omega}$ , the quadratic form associated to the Hessian of  $J$  is

$$f : \boldsymbol{\theta} = \text{vec}(\Delta \mathbf{B}, \Delta \mathbf{M}, \Delta \mathbf{S}) \mapsto f(\boldsymbol{\theta}) = \boldsymbol{\theta}^\top \nabla_{\mathbf{B}, \mathbf{M}, \mathbf{S}}^2 J(\mathbf{B}, \mathbf{M}, \mathbf{S}, \boldsymbol{\Omega}) \boldsymbol{\theta}.$$

Let  $\sqrt{\mathbf{A}}$  be the element-wise square-root of matrix  $\mathbf{A}$  and  $\mathbf{S}^\circledast$  the element-wise inverse of matrix  $\mathbf{S}$ . The quadratic form simplifies to

$$\begin{aligned} f(\boldsymbol{\theta}) &= -\text{tr}([\sqrt{\mathbf{A}} \odot \mathbf{X}\Delta \mathbf{B}]^\top [\sqrt{\mathbf{A}} \odot \mathbf{X}\Delta \mathbf{B}]) - 2\text{tr}([\sqrt{\mathbf{A}} \odot \mathbf{X}\Delta \mathbf{B}]^\top [\sqrt{\mathbf{A}} \odot \Delta \mathbf{M}]) \\ &\quad - \text{tr}([\sqrt{\mathbf{A}} \odot \mathbf{X}\Delta \mathbf{B}]^\top [\sqrt{\mathbf{A}} \odot \Delta \mathbf{S}]) - \text{tr}([\sqrt{\mathbf{A}} \odot \Delta \mathbf{M}]^\top [\sqrt{\mathbf{A}} \odot \Delta \mathbf{M}]) \\ &\quad - \text{tr}([\sqrt{\mathbf{A}} \odot \Delta \mathbf{M}]^\top [\sqrt{\mathbf{A}} \odot \Delta \mathbf{S}]) - \text{tr}([\sqrt{\mathbf{A}} \odot \Delta \mathbf{S}]^\top [\sqrt{\mathbf{A}} \odot \Delta \mathbf{S}])/4 \\ &\quad - \text{tr}(\Delta \mathbf{M} \boldsymbol{\Omega} \Delta \mathbf{M}^\top) - \text{tr}([\mathbf{S}^\circledast \odot \Delta \mathbf{S}]^\top [\mathbf{S}^\circledast \odot \Delta \mathbf{S}])/2 \\ &= -\|\sqrt{\mathbf{A}} \odot [\mathbf{X}\Delta \mathbf{B} + \Delta \mathbf{M} + \Delta \mathbf{S}/2]\|_F^2 - \|\Delta \mathbf{M} \boldsymbol{\Omega}^{1/2}\|_F^2 - \|\mathbf{S}^\circledast \odot \Delta \mathbf{S}\|_F^2/2 \\ &\leq 0, \end{aligned}$$

hence the Hessian matrix is negative semi-definite, which proves the concavity of  $J(\mathbf{B}, \mathbf{M}, \mathbf{S})$ . For strictness, consider a triplet  $(\Delta \mathbf{B}, \Delta \mathbf{M}, \Delta \mathbf{S})$  such that  $f(\boldsymbol{\theta}) = 0$ . By definition of  $\mathbf{S}^\circledast$  and the positive definiteness of  $\boldsymbol{\Omega}$ ,  $\Delta \mathbf{S} = \Delta \mathbf{M} = 0$ . Finally, since all entries in  $\mathbf{A}$  are positive, it leads to  $\mathbf{X}\Delta \mathbf{B} = 0$  which implies  $\Delta \mathbf{B} = 0$  as soon as  $\mathbf{X}$  has full rank. The lower bound  $J(\mathbf{B}, \mathbf{M}, \mathbf{S})$  is thus strictly concave with this assumption.

We now prove the concavity of  $J(\boldsymbol{\Omega})$ . The Hessian for fixed  $(\mathbf{B}, \mathbf{M}, \mathbf{S})$  is

$$-\frac{n}{2} \boldsymbol{\Omega}^{-1} \otimes \boldsymbol{\Omega}^{-1},$$

where  $\otimes$  denotes the Kronecker product. Since  $\boldsymbol{\Omega}^{-1}$  is positive definite, so is  $\boldsymbol{\Omega}^{-1} \otimes \boldsymbol{\Omega}^{-1}$  and therefore  $J$  is strictly concave in  $\boldsymbol{\Omega}$ .

## S2 Simulation scheme

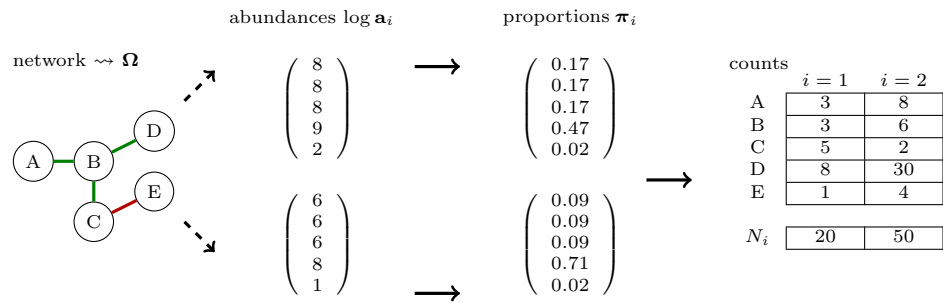

Figure 1: Compositional model used for data generation

### S3 Simulation study: accounting for covariates

| covar.                    | method     | area under the ROC |                   |                   | area under the PR |                   |                   |
|---------------------------|------------|--------------------|-------------------|-------------------|-------------------|-------------------|-------------------|
|                           |            | n = p/2            | n = p             | n = 2p            | n = p/2           | n = p             | n = 2p            |
| <b>scale-free network</b> |            |                    |                   |                   |                   |                   |                   |
| small                     | PLNnetwork | .66 (0.05)         | <b>.78</b> (0.05) | <b>.91</b> (0.03) | <b>.11</b> (0.04) | <b>.25</b> (0.07) | <b>.49</b> (0.08) |
|                           | sparCC     | .66 (0.05)         | .73 (0.05)        | .79 (0.05)        | .09 (0.03)        | .16 (0.05)        | .24 (0.07)        |
|                           | SPiEC-Easi | <b>.67</b> (0.04)  | .77 (0.05)        | .85 (0.04)        | .10 (0.03)        | .17 (0.05)        | .27 (0.07)        |
| medium                    | PLNnetwork | <b>.62</b> (0.05)  | <b>.73</b> (0.05) | <b>.85</b> (0.05) | <b>.09</b> (0.03) | <b>.18</b> (0.06) | <b>.34</b> (0.08) |
|                           | sparCC     | .55 (0.05)         | .57 (0.05)        | .58 (0.05)        | .05 (0.01)        | .05 (0.01)        | .06 (0.01)        |
|                           | SPiEC-Easi | .61 (0.04)         | .66 (0.04)        | .71 (0.03)        | .06 (0.01)        | .06 (0.01)        | .07 (0.01)        |
| large                     | PLNnetwork | <b>.58</b> (0.05)  | <b>.67</b> (0.05) | <b>.78</b> (0.05) | <b>.07</b> (0.03) | <b>.12</b> (0.04) | <b>.23</b> (0.07) |
|                           | sparCC     | .52 (0.04)         | .53 (0.04)        | .53 (0.05)        | .04 (0.01)        | .04 (0.01)        | .04 (0.01)        |
|                           | SPiEC-Easi | .57 (0.04)         | .60 (0.03)        | .65 (0.03)        | .05 (0.01)        | .05 (0.01)        | .05 (0.01)        |
| <b>random network</b>     |            |                    |                   |                   |                   |                   |                   |
| small                     | PLNnetwork | .77 (0.07)         | <b>.90</b> (0.04) | <b>.96</b> (0.01) | <b>.14</b> (0.07) | <b>.36</b> (0.11) | <b>.64</b> (0.09) |
|                           | sparCC     | .76 (0.06)         | .83 (0.06)        | .89 (0.04)        | .11 (0.05)        | .23 (0.09)        | .36 (0.11)        |
|                           | SPiEC-Easi | <b>.78</b> (0.05)  | .87 (0.04)        | .92 (0.03)        | .11 (0.05)        | .23 (0.09)        | .36 (0.11)        |
| medium                    | PLNnetwork | <b>.72</b> (0.06)  | <b>.85</b> (0.05) | <b>.94</b> (0.02) | <b>.09</b> (0.04) | <b>.24</b> (0.09) | <b>.49</b> (0.10) |
|                           | sparCC     | .59 (0.06)         | .61 (0.07)        | .62 (0.06)        | .03 (0.01)        | .04 (0.02)        | .04 (0.02)        |
|                           | SPiEC-Easi | .67 (0.05)         | .74 (0.05)        | .77 (0.03)        | .04 (0.01)        | .05 (0.02)        | .05 (0.01)        |
| large                     | PLNnetwork | <b>.64</b> (0.07)  | <b>.78</b> (0.06) | <b>.88</b> (0.04) | <b>.06</b> (0.03) | <b>.14</b> (0.07) | <b>.29</b> (0.09) |
|                           | sparCC     | .54 (0.05)         | .53 (0.06)        | .54 (0.06)        | .02 (0.01)        | .02 (0.01)        | .03 (0.01)        |
|                           | SPiEC-Easi | .61 (0.05)         | .65 (0.04)        | .68 (0.03)        | .03 (0.00)        | .03 (0.00)        | .03 (0.01)        |
| <b>community network</b>  |            |                    |                   |                   |                   |                   |                   |
| small                     | PLNnetwork | .60 (0.04)         | .69 (0.04)        | <b>.78</b> (0.05) | <b>.17</b> (0.03) | <b>.26</b> (0.04) | <b>.38</b> (0.05) |
|                           | sparCC     | <b>.62</b> (0.04)  | .66 (0.04)        | .70 (0.04)        | .16 (0.02)        | .21 (0.04)        | .26 (0.04)        |
|                           | SPiEC-Easi | <b>.62</b> (0.04)  | <b>.70</b> (0.04) | .77 (0.04)        | <b>.17</b> (0.02) | .24 (0.04)        | .31 (0.04)        |
| medium                    | PLNnetwork | .57 (0.03)         | <b>.65</b> (0.04) | <b>.73</b> (0.05) | <b>.15</b> (0.02) | <b>.22</b> (0.03) | <b>.31</b> (0.05) |
|                           | sparCC     | .55 (0.03)         | .56 (0.04)        | .56 (0.03)        | .11 (0.02)        | .12 (0.02)        | .12 (0.02)        |
|                           | SPiEC-Easi | <b>.58</b> (0.03)  | .63 (0.03)        | .67 (0.03)        | .13 (0.02)        | .14 (0.02)        | .15 (0.02)        |
| large                     | PLNnetwork | <b>.55</b> (0.03)  | <b>.60</b> (0.04) | <b>.67</b> (0.04) | <b>.13</b> (0.02) | <b>.17</b> (0.03) | <b>.24</b> (0.04) |
|                           | sparCC     | .52 (0.03)         | .52 (0.03)        | .52 (0.03)        | .10 (0.02)        | .10 (0.02)        | .10 (0.02)        |
|                           | SPiEC-Easi | <b>.55</b> (0.03)  | .58 (0.03)        | .62 (0.03)        | .11 (0.01)        | .11 (0.02)        | .12 (0.01)        |

Table 1: Areas under the ROC curve and Areas under the Precision-Recall curve of the compositional methods (PLNnetwork, sparCC and SPiEC-Easi) in various settings, averaged over 100 simulations, with standard errors.

## S4 Table of OTU

| Type  | OTU      | Family              | Genus            | Species                     |   |
|-------|----------|---------------------|------------------|-----------------------------|---|
| Fungi | f1       | Dermateaceae        | Naevata          | Naevata minutissima         |   |
|       | f3       | –                   | –                | –                           |   |
|       | f4       | Erysiphaceae        | Erysiphe         | Erysiphe hypophylla         |   |
|       | f8       | Hyaloscyphaceae     | Catenulifera     | Catenulifera brevicollaris  |   |
|       | f10      | –                   | –                | –                           |   |
|       | f12      | Amphisphaeriaceae   | Monochaetia      | Monochaetia kansensis       |   |
|       | f17      | Herpotrichiellaceae | Cyphellophora    | Cyphellophora hylomeconis   |   |
|       | f19      | –                   | –                | –                           |   |
|       | f25      | unidentified        | Cryptococcus     | Cryptococcus magnus         |   |
|       | f27      | unidentified        | Strelitziana     | Strelitziana mali           |   |
|       | f29      | Mycosphaerellaceae  | Xenosonderhenia  | Xenosonderhenia syzygii     |   |
|       | f32      | –                   | –                | –                           |   |
|       | f39      | –                   | –                | –                           |   |
|       | f1085    | Mycosphaerellaceae  | Mycosphaerella   | Mycosphaerella marksii      |   |
|       | f1090    | Herpotrichiellaceae | Cyphellophora    | Cyphellophora hylomeconis   |   |
|       | f1278    | Mycosphaerellaceae  | Mycosphaerella   | Mycosphaerella punctiformis |   |
|       | Ea       | Erysiphaceae        | Erysiphe         | Erysiphe alphitoides        |   |
|       | Bacteria | b13                 | Oxalobacteraceae | –                           | – |
|       |          | b153                | Oxalobacteraceae | –                           | – |
| b21   |          | Pseudomonadaceae    | Pseudomonas      | –                           |   |
| b25   |          | Enterobacteriaceae  | –                | –                           |   |
| b26   |          | Oxalobacteraceae    | –                | –                           |   |
| b33   |          | Microbacteriaceae   | Rathayibacter    | –                           |   |
| b364  |          | Oxalobacteraceae    | –                | –                           |   |
| b37   |          | Beijerinckiaceae    | Beijerinckia     | –                           |   |
| b44   |          | –                   | –                | –                           |   |
| b60   |          | –                   | –                | –                           |   |

Table 2: Type of microorganism (bacteria or fungi) and higher level taxonomic assignments (family, genus and species) of the 27 operational taxonomic units (OTUs) interacting in the inferred microbial networks. Unknown assignments at a given rank are reported as ‘–’.
